# Supplementary material for: Interleukin-31 and thymic stromal lymphopoietin expression in plasma and lymph node from Hodgkin lymphoma patients
Source: PubMed Central journal article supplement (PMC5689608; doi:10.18632/oncotarget.19665), 2017-07-28
Supplement: oncotarget-08-85263-s001.pdf [file oncotarget-08-85263-s001.pdf]

## Interleukin-31 and thymic stromal lymphopoietin expression in plasma and lymph node from Hodgkin lymphoma patients

### SUPPLEMENTARY MATERIALS

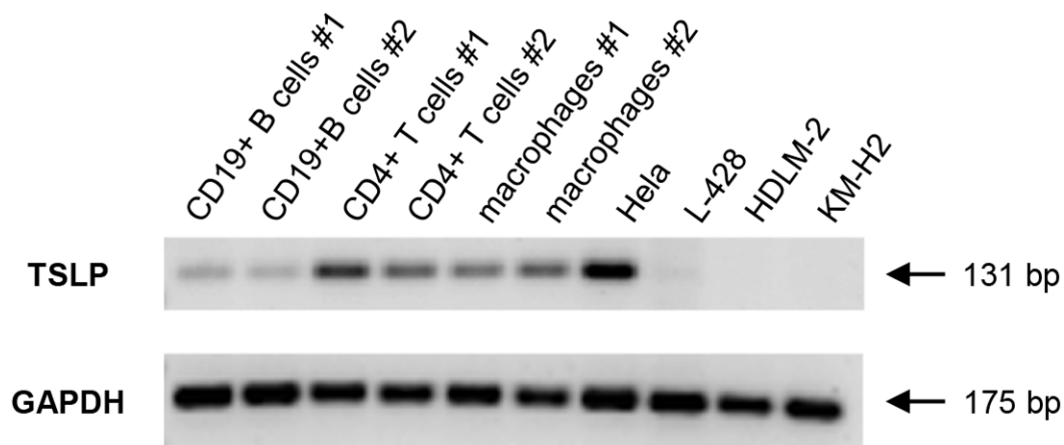

**Supplementary Figure 1: mRNA expression of the TSLP and GAPDH genes.** mRNA was detected by RT-PCR in CD19+B cells, CD4+T cells, and in three HL cell lines (L-428, HDLM-2, KM-H2). The HeLa cell line was tested as positive control.

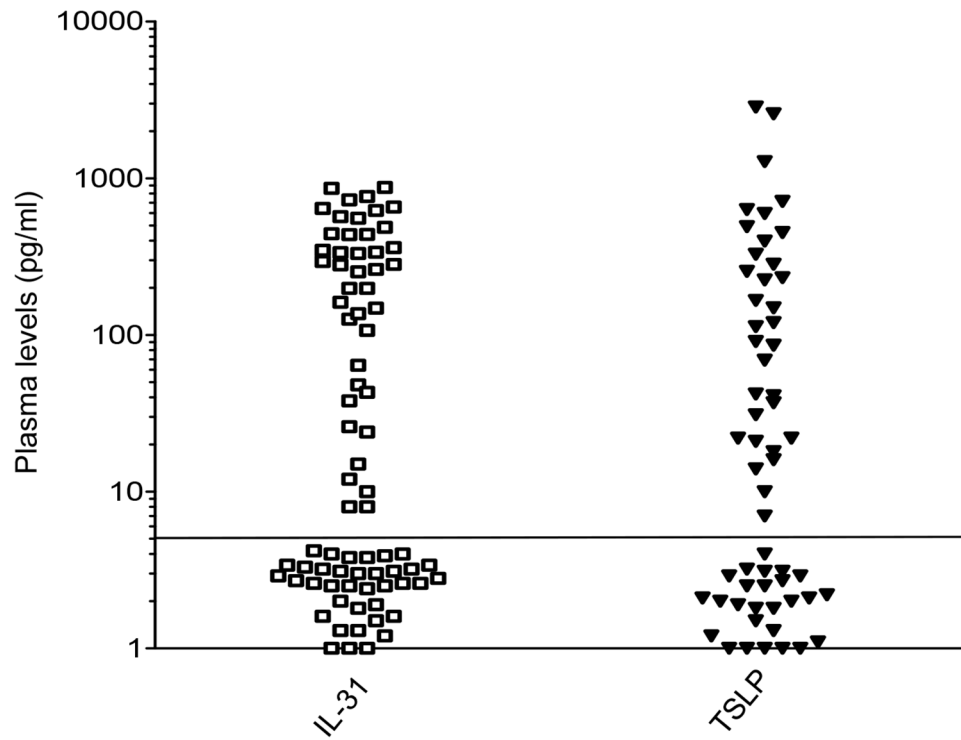

**Supplementary Figure 2: IL-31/TSLP plasma levels in healthy controls.** sIL-31/TSLP levels were assayed by ELISA (threshold of detection 5 pg/ml).sIL-31 was detected in 42/84 donors, sTSLP in 32/59 donors. The horizontal line separates positive from negative results.

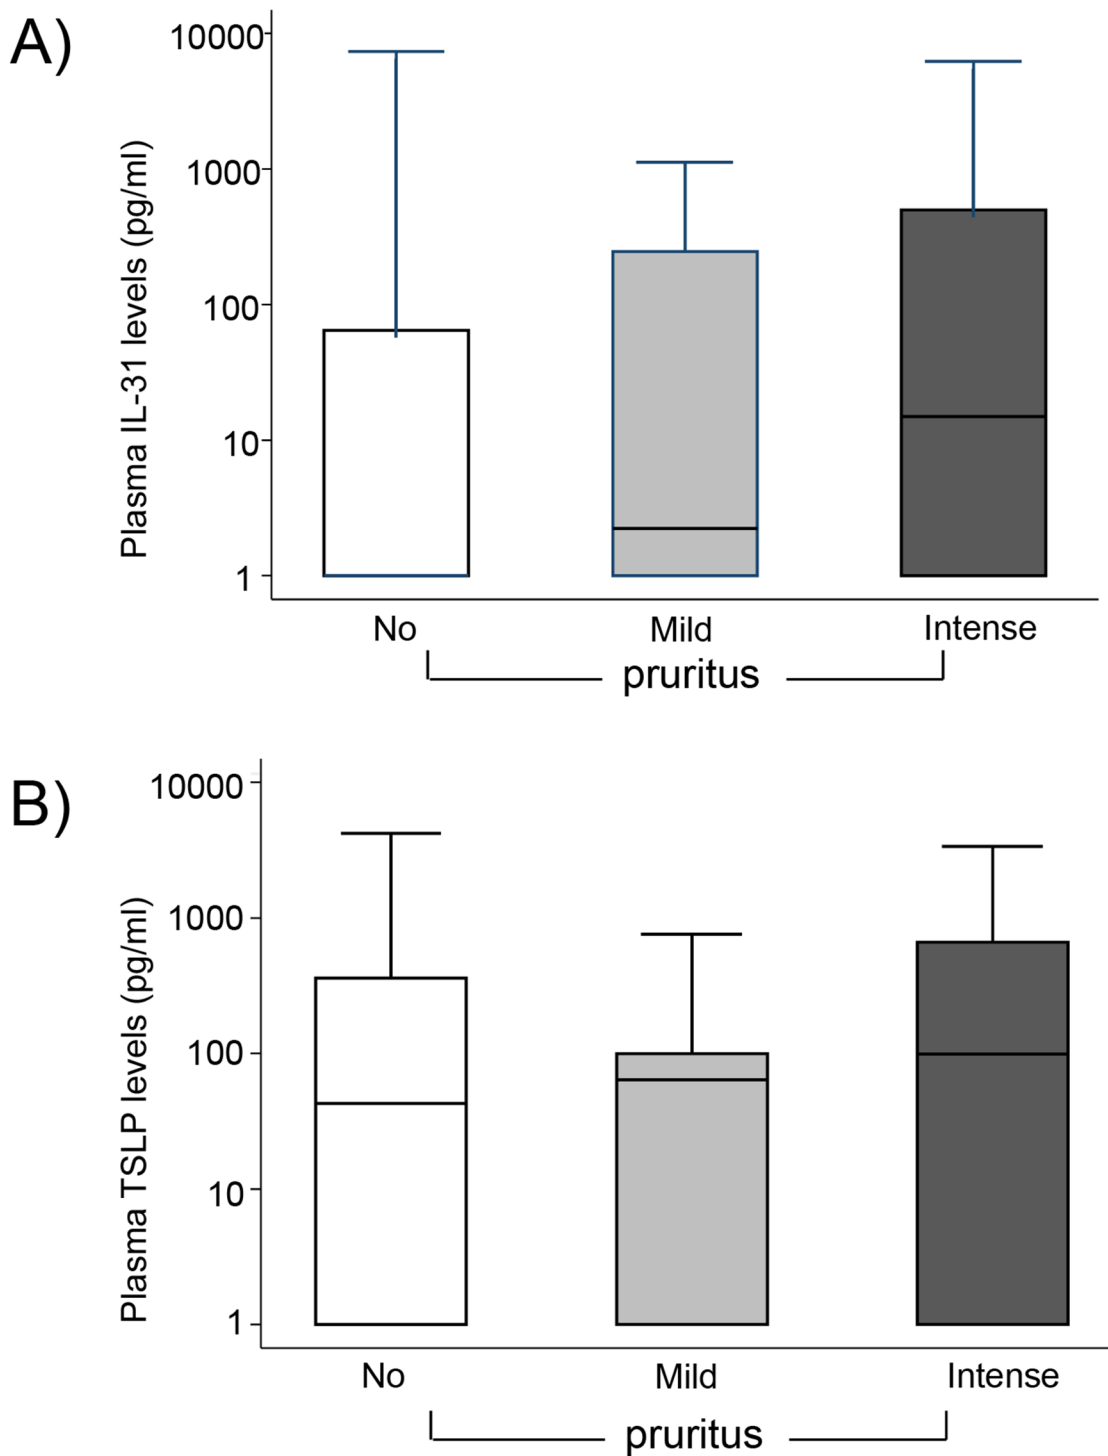

**Supplementary Figure 3: IL-31 and TSLP plasma levels and pruritus in HL patients.** sIL-31 (A) and sTSLP (B) plasma levels (pg/ml) in 69 HL patients were correlated with pruritus defined as: none, mild, and intense. Results are expressed in box plot as median levels, first and third quartiles, maximum and minimum values.

Supplementary Table 1: IL-31 and TSLP expression

|                                           | HL lymph node           |                          |                              |                         | Reactive lymph node     |                          |                              |                         |
|-------------------------------------------|-------------------------|--------------------------|------------------------------|-------------------------|-------------------------|--------------------------|------------------------------|-------------------------|
|                                           | IL-31<br>surface        | IL-31<br>intracellular   | TSLP<br>surface              | TSLP<br>intracellular   | IL-31<br>surface        | IL-31<br>intracellular   | TSLP<br>surface              | TSLP<br>intracellular   |
| <b>Median MRFI<br/>on CD19+<br/>cells</b> | <b>19</b><br>(8.3-34)   | <b>5.5</b><br>(4.6-7.2)  | <b>1.1</b><br>(1.0-1.3)      | <b>2.4</b><br>(1.1-2.8) | <b>16.8</b><br>(9-28.9) | <b>3.9</b><br>(3-5)      | <b>1.6</b><br>(1-2)          | <b>2.8</b><br>(2.1-3)   |
| <b>Median MRFI<br/>on CD4+ cells</b>      | <b>1.7</b><br>(1.5-5.3) | <b>4.1</b><br>(3.0-5.2)  | <b>1.1</b><br>(1.0-1.3)      | <b>2.2</b><br>(1.2-3.8) | <b>1.7</b><br>(1-3.6)   | <b>3.2</b><br>(2-5.8)    | <b>1.3</b><br>(1.1-1.4)      | <b>2.4</b><br>(1.3-4.9) |
| <b>Median MRFI<br/>on CD68+<br/>cells</b> | <b>18.5</b><br>(4.2-26) | <b>8.6</b><br>(5.4-12.5) | <b>4.6</b><br>(3.1-<br>10.5) | <b>3.9</b><br>(3.4-4.2) | <b>23</b><br>(3.8-40)   | <b>8.5</b><br>(4.6-13.8) | <b>4.9</b><br>(2.2-<br>10.7) | <b>3.8</b><br>(1-6.3)   |

Median MRFI of IL-31 and TSLP detected in immune cell populations from both HL and control reactive lymph nodes.

Supplementary Table 2: IL-31 and TSLP receptors expression

|                                   | HL lymph node           |                         |                         |                         | Reactive lymph node     |                         |                         |                         |
|-----------------------------------|-------------------------|-------------------------|-------------------------|-------------------------|-------------------------|-------------------------|-------------------------|-------------------------|
|                                   | IL-31RA                 | OSMR                    | TSLPR                   | CD127                   | IL-31RA                 | OSMR                    | TSLPR                   | CD127                   |
| <b>Median MRFI on CD19+ cells</b> | <b>2.1</b><br>(1.5-2.8) | <b>3</b><br>(2-4.8)     | <b>1.9</b><br>(1.2-2.5) | <b>2.2</b><br>(1.6-2.9) | <b>2.3</b><br>(1.5-3.7) | <b>3.2</b><br>(2.4-4.7) | <b>1.6</b><br>(1.3-2.1) | <b>2.1</b><br>(1.7-2.9) |
| <b>Median MRFI on CD4+ cells</b>  | <b>2</b><br>(1-2.9)     | <b>2.7</b><br>(1.6-3.2) | <b>1.2</b><br>(1-2.2)   | <b>6.2</b><br>(2.2-7.5) | <b>1.9</b><br>(2.6-2.2) | <b>3.2</b><br>(2.6-3.7) | <b>2.1</b><br>(1.2-2.4) | <b>5.6</b><br>(3.3-8)   |
| <b>Median MRFI on CD68+ cells</b> | <b>2.7</b><br>(1.8-6)   | <b>2.8</b><br>(2.2-4.2) | <b>2</b><br>(1-2.5)     | <b>2.1</b><br>(1.8-2.4) | <b>3.4</b><br>(1.5-4.6) | <b>4</b><br>(2.9-3)     | <b>1.6</b><br>(1.2-3.1) | <b>2.4</b><br>(2-2.8)   |

Median MRFI of IL-31R and TSLPR detected in immune cell populations from both HL and control reactive lymph nodes.
